# Supplementary material
Source: PubMed Central journal article supplement (PMC4020052)
Supplement: 1400166111_pnas.201400166SI.pdf [file 1400166111_pnas.201400166SI.pdf]

# Supporting Information

Zhao et al. 10.1073/pnas.1400166111

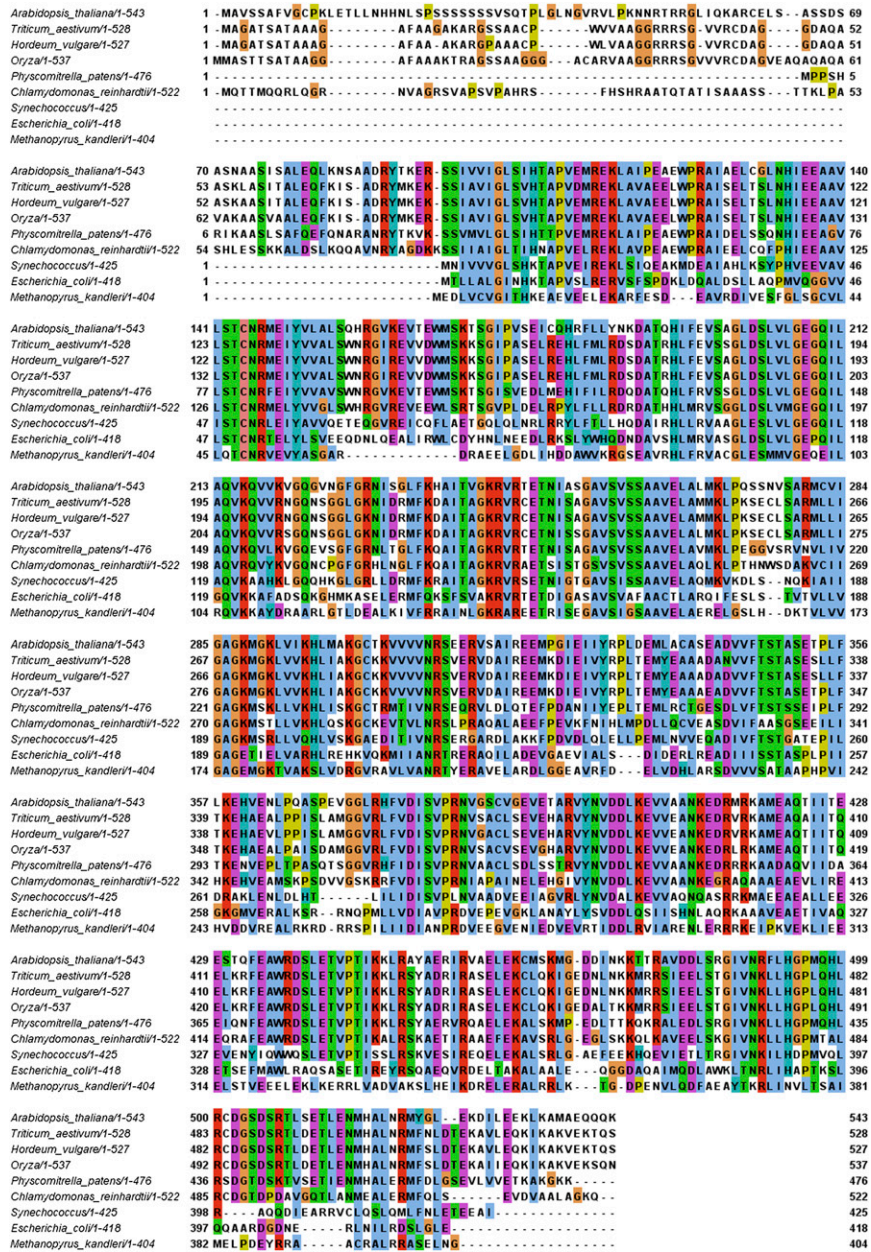

Fig. S1. Sequence alignment of *Arabidopsis* glutamyl-tRNA reductase (GluTR) with *Methanopyrus* and other homologs. The alignment is colored by conservation.

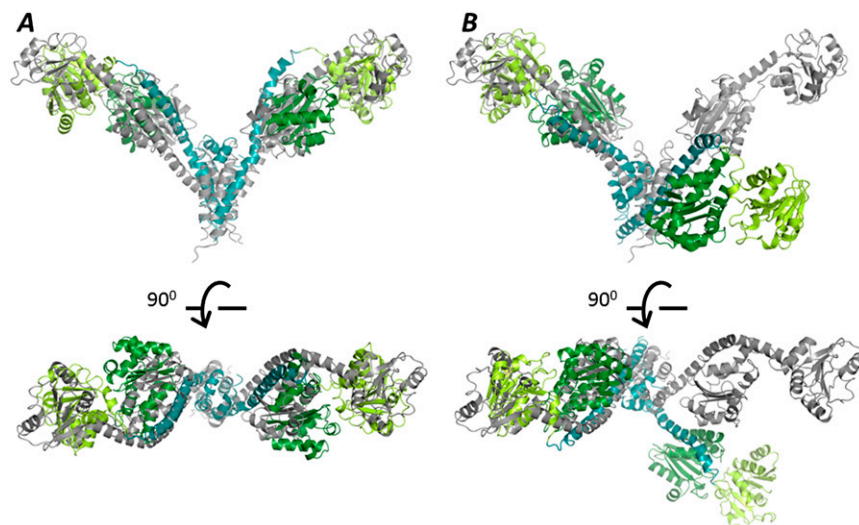

**Fig. S2.** Structure comparison of *Methanopyrus kandleri* GluTR (*MkGluTR*) and *Arabidopsis* GluTR (*AtGluTR*). (A) Superposition of the two dimers. (B) Superposition of the monomeric halves. *MkGluTR* is colored gray and *Arabidopsis* GluTR is colored the same as in Fig. 1.

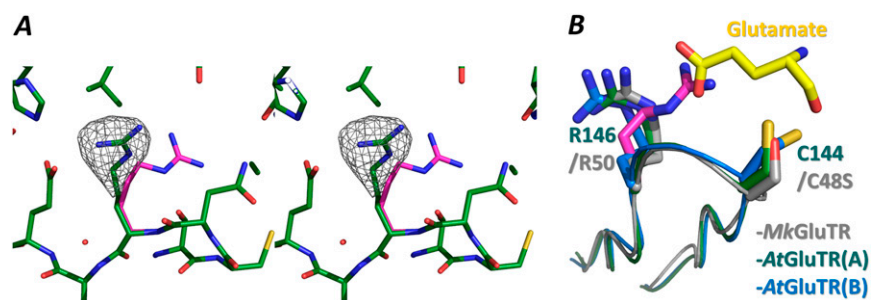

**Fig. S3.** Alternative conformations of GluTR Arg146. (A) Stereo view of the double conformations of Arg146 on chain A of GluTR. The alternative conformation of Arg146 on chain A is displayed together with electron density calculated by using the  $F_o - F_c$  coefficient and contoured at  $3.0\sigma$  as a gray mesh. Arg146 on chain B does not have double conformations. (B) Superposition of Arg146 conformations and *MkGluTR* Arg50. Carbon atoms are colored as indicated, with the glutamate moiety of glutamycin in the *MkGluTR* structure shown in yellow (O, red; N, blue; S, orange).

**Table S1. Data collection, phasing, and refinement statistics for GluTR-GluBP structures**

|                                                      | GluTR-GluBP                                   | GluTR-seGluBP*                                | seGluTR-seGluBP <sup>†</sup>                  |
|------------------------------------------------------|-----------------------------------------------|-----------------------------------------------|-----------------------------------------------|
| <b>Data collection</b>                               |                                               |                                               |                                               |
| Space group                                          | P2 <sub>1</sub> 2 <sub>1</sub> 2 <sub>1</sub> | P2 <sub>1</sub> 2 <sub>1</sub> 2 <sub>1</sub> | P2 <sub>1</sub> 2 <sub>1</sub> 2 <sub>1</sub> |
| Cell dimensions                                      |                                               |                                               |                                               |
| <i>a</i> , <i>b</i> , <i>c</i> , Å                   | 59.4, 84.8, 360.0                             | 60.0, 84.0, 360.2                             | 60.1, 84.1, 362.0                             |
| $\alpha$ , $\beta$ , $\gamma$ , °                    | 90, 90, 90                                    | 90, 90, 90                                    | 90, 90, 90                                    |
| Wavelength, Å                                        | 0.9793                                        | 0.9793                                        | 0.9793                                        |
| Resolution, Å <sup>‡</sup>                           | 2.80 (2.90–2.80)                              | 4.20 (4.35–4.20)                              | 3.10 (3.21–3.10)                              |
| <i>R</i> <sub>sym</sub> or <i>R</i> <sub>merge</sub> | 0.104 (0.551)                                 | 0.212 (0.529)                                 | 0.183 (0.574)                                 |
| <i>I</i> / $\sigma$ <i>I</i>                         | 17.7 (3.8)                                    | 38.7 (15)                                     | 12.5 (4.1)                                    |
| Completeness, %                                      | 94.3 (93.4)                                   | 100 (100)                                     | 99.8 (100)                                    |
| Redundancy                                           | 7.1 (7.5)                                     | 25.1 (25.9)                                   | 8.4 (8.8)                                     |
| <b>Refinement</b>                                    |                                               |                                               |                                               |
| Resolution, Å                                        | 49.56–2.80                                    | —                                             | —                                             |
| No. reflections                                      | 43,245                                        | —                                             | —                                             |
| <i>R</i> <sub>work</sub> / <i>R</i> <sub>free</sub>  | 0.221/0.272                                   | —                                             | —                                             |
| No. atoms                                            |                                               |                                               |                                               |
| Protein                                              | 9,920                                         | —                                             | —                                             |
| Ligand/ion                                           | 0                                             |                                               |                                               |
| Water                                                | 47                                            |                                               |                                               |
| $\beta$ -Factors                                     |                                               |                                               |                                               |
| Protein                                              | 62.3                                          |                                               |                                               |
| Ligand/ion                                           | None                                          |                                               |                                               |
| Water                                                | 31.7                                          |                                               |                                               |
| rmsds                                                |                                               |                                               |                                               |
| Bond lengths, Å                                      | 0.003                                         |                                               |                                               |
| Bond angles, °                                       | 0.969                                         |                                               |                                               |

GluBP, glutamyl-tRNA reductase binding protein.

\*Methionines were replaced by selenomethionines in GluBP only.

<sup>†</sup>Methionines were replaced by selenomethionines in GluTR and GluBP.

<sup>‡</sup>Values in parentheses are for highest-resolution shell.
